# Supplementary material
Source: Research Square preprint supplement (doi:10.21203/rs.3.rs-9250235/v1)
Supplement: Supplementary file 1 [file b479630c02d836a0df3875ce.docx]

Multi-epitope vaccine core sequence

TPQNITDLCAEYHNTQIHTLNDKIFSYTESLAGKREMAIITFKNGATFQVEVPGSQHIDSQKKAIERMKDTLRIAYLTEAKVEKLCVWNNKTPHAIAAISMANEAAKAKFVAAWTLKAAAAAYAPSVYDEALAAYMVHVGGDNYAAYAPVEVAPQYAAYYGVEGDAGYGPGPGNPLGFNVTSYRVDPEGPGPGPLGFNVTSYRVDPEMGPGPGDKQYGSNVRTSVTIVGPGPGLTAGIAGSQIKLNNGGPGPGYLTAGIAGSQIKLNNKKNGQGNAPSVYDEALNWKKENPSCAPGEKDGKIVPKKDGKIVPALAAGGHYDPKKMFGRKKKMGVVQEAAKTGALLAAGAAA

Kozak sequence

GCCATGATGG

tPA sequence(UniProt ID:P00750)

MDAMKRGLCCVLLLCGAVFVSPS

MITD sequence (UniProt ID: Q8WV92）

MAKSGLRQDPQSTAAATVLKRAVELDSESRYPQALVCYQEGIDLLLQVLKGTKDNTKRCNLREKISKYMDRAENIKKYLDQEKEDGKYHKQIKIEENATGFSYESLFREYLNETVTEVWIEDPYIRHTHQLYNFLRFCEMLIKRPCKVKTIHLLTSLDEGIEQVQQSRGLQEIEESLRSHGVLLEVQYSSSIHDREIRFNNGWMIKIGRGLDYFKKPQSRFSLGYCDFDLRPCHETTVDIFHKKHTKNI

5’UTR

GGACAGATCGCCTGGAGACGCCATCCACGCTGTTTTGACCTCCATAGAAGACACCGGGACCGATCCAGCCTCCGCGGCCGGGAACGGTGCATTGGAACGCGGATTCCCCGTGCCAAGAGTGACTCACCGTCCTTGACACG

3’UTR

TGACGGGTGGCATCCCTGTGACCCCTCCCCAGTGCCTCTCCTGGCCCTGGAAGTTGCCACTCCAGTGCCCACCAGCCTTGTCCTAATAAAATTAAGTTGCATCAAGCT

Full-cDNA sequence

GGACAGATCGCCTGGAGACGCCATCCACGCTGTTTTGACCTCCATAGAAGACACCGGGACCGATCCAGCCTCCGCGGCCGGGAACGGTGCATTGGAACGCGGATTCCCCGTGCCAAGAGTGACTCACCGTCCTTGACACGGCCATGATGGACCGCCGCCACCCGCCCCGCCCCCTGCTGCGCCCCCCCCCCCTGCGCCGCCGCCTGCGCCAGCCCCAGCGAGGCCGCCGCCAAGATGATCAAGCTGAAGTTCGGCGTGTTCTTCACCGTGCTGCTGAGCAGCGCCTACGCCAACGGCACCCCCCAGAACATCACCGACCTGTGCGCCGAGTACCACAACACCCAGATCCACACCCTGAACGACAAGATCTTCAGCTACACCGAGAGCCTGGCCGGCAAGCGCGAGATGGCCATCATCACCTTCAAGAACGGCGCCACCTTCCAGGTGGAGGTGCCCGGCAGCCAGCACATCGACAGCCAGAAGAAGGCCATCGAGCGCATGAAGGACACCCTGCGCATCGCCTACCTGACCGAGGCCAAGGTGGAGAAGCTGTGCGTGTGGAACAACAAGACCCCCCACGCCATCGCCGCCATCAGCATGGCCAACGAGGCCGCCGCCAAGGCCAAGTTCGTGGCCGCCTGGACCCTGAAGGCCGCCGCCGCCGCCTACGCCCCCAGCGTGTACGACGAGGCCCTGGCCGCCTACATGGTGCACGTGGGCGGCGACAACTACGCCGCCTACGCCCCCGTGGAGGTGGCCCCCCAGTACGCCGCCTACTACGGCGTGGAGGGCGACGCCGGCTACGGCCCCGGCCCCGGCAACCCCCTGGGCTTCAACGTGACCAGCTACCGCGTGGACCCCGAGGGCCCCGGCCCCGGCCCCCTGGGCTTCAACGTGACCAGCTACCGCGTGGACCCCGAGATGGGCCCCGGCCCCGGCGACAAGCAGTACGGCAGCAACGTGCGCACCAGCGTGACCATCGTGGGCCCCGGCCCCGGCCTGACCGCCGGCATCGCCGGCAGCCAGATCAAGCTGAACAACGGCGGCCCCGGCCCCGGCTACCTGACCGCCGGCATCGCCGGCAGCCAGATCAAGCTGAACAACAAGAAGAACGGCCAGGGCAACGCCCCCAGCGTGTACGACGAGGCCCTGAACTGGAAGAAGGAGAACCCCAGCTGCGCCCCCGGCGAGAAGGACGGCAAGATCGTGCCCAAGAAGGACGGCAAGATCGTGCCCGCCCTGGCCGCCGGCGGCCACTACGACCCCAAGAAGATGTTCGGCCGCAAGAAGAAGATGGGCGTGGTGCAGGAGGCCGCCGCCAAGACCGGCGCCCTGCTGGCCGCCGGCGCCGCCGCCATGGCCAAGAGCGGCCTGCGCCAGGACCCCCAGAGCACCGCCGCCGCCACCGTGCTGAAGCGCGCCGTGGAGCTGGACAGCGAGAGCCGCTACCCCCAGGCCCTGGTGTGCTACCAGGAGGGCATCGACCTGCTGCTGCAGGTGCTGAAGGGCACCAAGGACAACACCAAGCGCTGCAACCTGCGCGAGAAGATCAGCAAGTACATGGACCGCGCCGAGAACATCAAGAAGTACCTGGACCAGGAGAAGGAGGACGGCAAGTACCACAAGCAGATCAAGATCGAGGAGAACGCCACCGGCTTCAGCTACGAGAGCCTGTTCCGCGAGTACCTGAACGAGACCGTGACCGAGGTGTGGATCGAGGACCCCTACATCCGCCACACCCACCAGCTGTACAACTTCCTGCGCTTCTGCGAGATGCTGATCAAGCGCCCCTGCAAGGTGAAGACCATCCACCTGCTGACCAGCCTGGACGAGGGCATCGAGCAGGTGCAGCAGAGCCGCGGCCTGCAGGAGATCGAGGAGAGCCTGCGCAGCCACGGCGTGCTGCTGGAGGTGCAGTACAGCAGCAGCATCCACGACCGCGAGATCCGCTTCAACAACGGCTGGATGATCAAGATCGGCCGCGGCCTGGACTACTTCAAGAAGCCCCAGAGCCGCTTCAGCCTGGGCTACTGCGACTTCGACCTGCGCCCCTGCCACGAGACCACCGTGGACATCTTCCACAAGAAGCACACCAAGAACATCTAATGACGGGTGGCATCCCTGTGACCCCTCCCCAGTGCCTCTCCTGGCCCTGGAAGTTGCCACTCCAGTGCCCACCAGCCTTGTCCTAATAAAATTAAGTTGCATCAAGCT


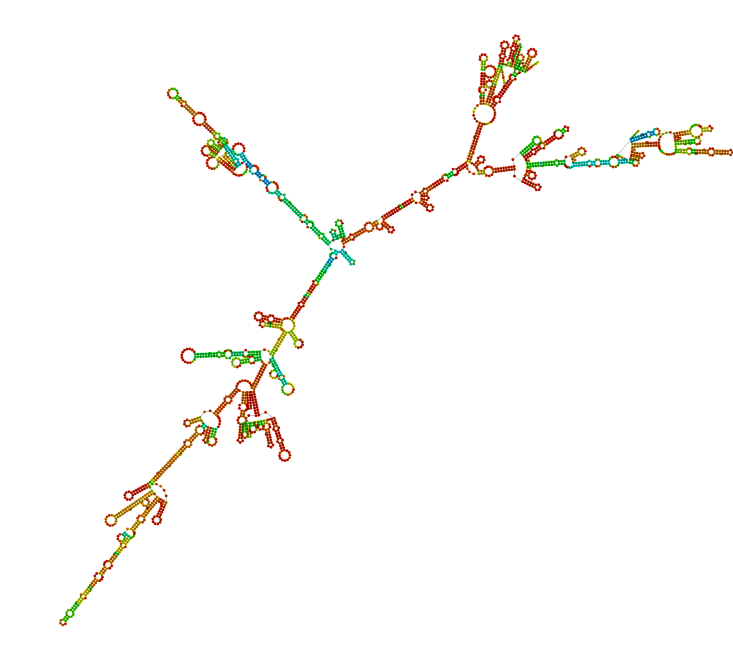


MFE secondary mRNA structure


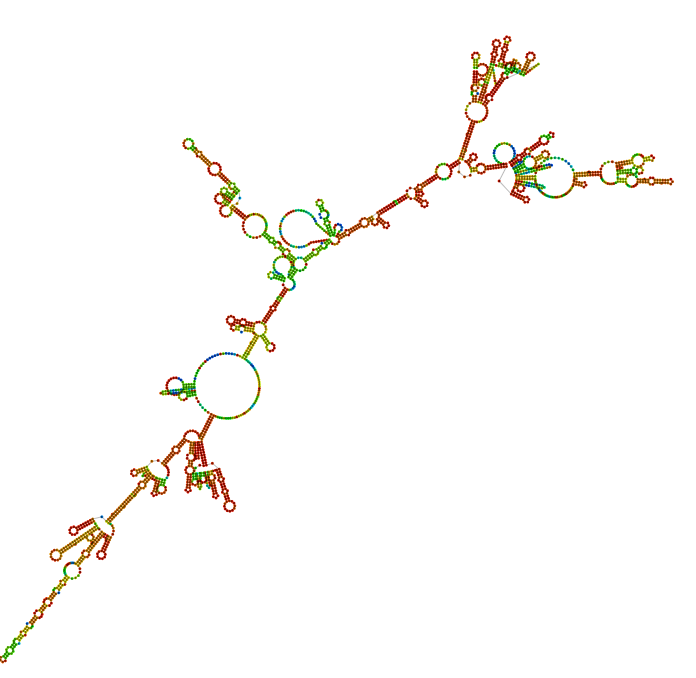


centroid secondary mRNA structure
